# Supplementary material for: Divergent Changes in Bacterial Functionality as Affected by Root-Zone Ecological Restoration in an Aged Peach Orchard
Source: MDPI journal article supplement (doi:10.3390/microorganisms10112127), 2022-10-27
Supplement: s1 [file s1]

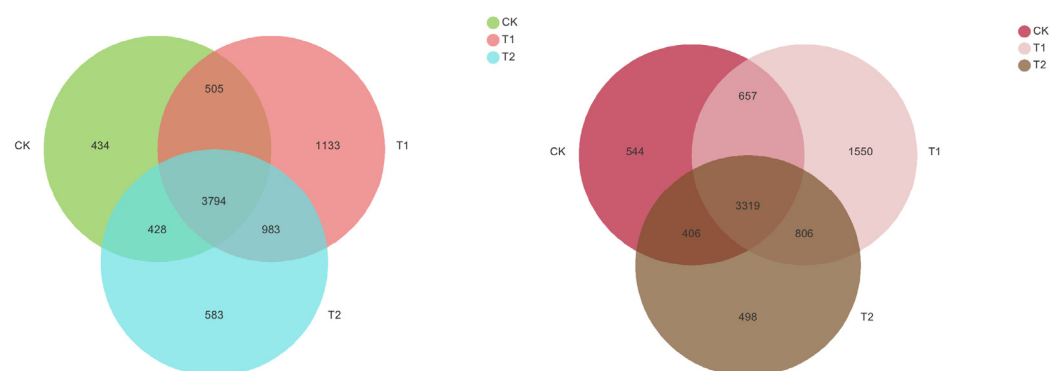

Figure S1 Venn diagram analysis of soil bacterial community in surface soil (0-20 cm, a) and subsurface soil (20-40 cm, b) on OTU level
